# Supplementary material
Source: publisher site journal article supplement (https://www.dovepress.com/article/445858)

**Supplementary Material**

**Supplementary Table 1. Names of all ethics committees/institutional review boards that approved the study**

| **Center n.** | **Center details** | **Ethics Committee name and address** |
| --- | --- | --- |
| **121** | **Centro Coordinatore RICHELDI Luca, Prof.** U.O.C. Pneumologia Policlinico Agostino Gemelli Largo Agostino Gemelli, 8 00168 Roma | **Comitato Etico Fondazione Policlinico A. Gemelli - IRCCS -Università Cattolica del Sacro Cuore** c/o Fondazione IRCCS Policlinico A. Gemelli Largo A. Gemelli, 8 00168 Roma |
| **101** | **DI STEFANO Fabio, Dr.** U.O.C. Pneumologia ASL Pescara - P.O. di Pescara Via Fonte Romana, 8 65124 Pescara | **Comitato Etico delle Province di Pescara e Chieti** c/o Segreteria Tecnico-Amministrativa Università degli Studi G. D’Annunzio Via dei Vestini, 29B 66100 Chieti |
| **102** | **COSTANTINO Elio, Dr.** U.O.C. Pneumologia ASM Matera - Ospedale Madonna della Grazie Contrada Cattedra Ambulante 75100 Matera | **Comitato Etico Unico Regionale della Basilicata**  c/o A.O. San Carlo Sala C - Palazzina Uffici - 1^ piano Via Potito Petrone 85100 Potenza |
| **103** | **PELAIA Girolamo, Dr.** U.O. Pneumologia A.O.U. Mater Domini Via Tommaso Campanella 88100 Catanzaro | **Comitato Etico Catania 2** A.O.R.N. Garibaldi Piazza Santa Maria di Gesù, 5 95124 Catania |
| **105** | **D'AMATO Maria, Dr.ssa** Dipartimento di Pneumologia e oncologia U.O.S.D. Malattie Respiratorie Federico II AORN Ospedale dei Colli - Ospedale Monaldi Via Leonardo Bianchi 80131 Napoli | **Comitato Etico Seconda Università degli Studi di Napoli - A.O. SUN Ospedale dei Colli** c/o Seconda Università degli Studi di Napoli Via Costantinopoli, 104 80138 NAPOLI |
| **106** | **BIANCO Andrea, Prof.** Dipartimento di Pneumologia e oncologia U.O.C. Clinica Pneumologica SUN AORN Ospedale dei Colli - Ospedale Monaldi Via Leonardo Bianchi 80131 Napoli | **Comitato Etico Seconda Università degli Studi di Napoli - A.O. SUN Ospedale dei Colli** c/o Seconda Università degli Studi di Napoli Via Costantinopoli, 104 80138 NAPOLI |
| **107** | **POLVERINO Mario, Prof.** U.O.C. Broncopneumologia ASL Salerno - P.O. Mauro Scarlato Via Passanti, 1 84018 Scafati (SA) | **Comitato Etico Campania Sud** ASL Napoli 3 Segreteria Tecnico-Scientifica Via Marconi, 66 80049 Torre del Greco (NA) |
| **109** | **VATRELLA Alessandro, Dr.** Dipartimento Specialità Mediche U.O. Clinica Pneumologica A.O.U. San Giovanni di Dio e Ruggi D'aragona Largo Città di Ippocrate, 1 84131 Salerno | **Comitato Etico Campania Sud** ASL Napoli 3 Segreteria Tecnico-Scientifica Via Marconi, 66 80049 Torre del Greco (NA) |
| **110** | **FARAONE Stanislao, Dr.** U.O.S. di Pneumologia P.O. Santa Maria della Pietà - Religiosi Camilliani Via San Rocco, 9 80026 Casoria (NA) | **Comitato Etico Campania Centro** ASL Napoli 1 Centro Via Comunale del Principe, 13/A 80124 Napoli |
| **111** | **FRANCO Cosimo, Dr.** U.O. di Pneumolgia AUSL di Piacenza - Ospedale Guglielmo da Saliceto Via Giuseppe Taverna, 49 29127 Piacenza | **Comitato Etico Area Vasta Emilia Nord** Segreteria Locale di Piacenza P.O. Guglielmo da Saliceto Via Taverna, 49 29121 Piacenza |
| **115** | **FACCIOLONGO Nicola, Dr.** U.O. di Pneumologia IRCCS - Arcispedale Santa Maria Nuova Viale Risorgimento, 80 42123 Reggio Emilia | **Comitato Etico Area Vasta Emilia Nord** Segreteria Locale di Reggio Emilia AUSL - IRCCS di Reggio Emilia Edificio Spallanzani - 1^piano -  Infrastruttura, Ricerca e Statistica Viale Umberto I, 50 42123 Reggio Emilia |
| **116** | **CLINI Enrico, Prof.** S.C. Malattie dell'Apparato Respiratorio A.O.U. di Modena Via del Pozzo, 71 41124 Modena | **Comitato Etico Area Vasta Emilia Nord** Segreteria Locale di Modena Policlinico di Modena Ingresso 3 - Piano Terra - Direzione Assistenza Farmaceutica Via Largo del Pozzo, 71 41124 Modena |
| **166** | **CHETTA Alfredo, Dr.** Dipartimento di Area Medica Generale U.O. di Clinica Pneumologica A.O.U. di Parma Via Gramsci, 1 43126 Parma | **Comitato Etico Area Vasta Emilia Nord** Segreteria Locale di Parma c/o Edificio Cattani - 1^ piano A.O.U. di Parma Via Gramsci, 1 43126 Parma |
| **112** | **CONTOLI Marco, Prof** U.O. di Pneumologia Nuovo Arcispedale Sant'Anna Via Aldo Moro, 8 44124 Cona (FE) | **Comitato Etico Area Vasta Emilia Centro** Segreteria Locale di Ferrara c/o Ufficio Ricerca Clinica Nuovo Arcispedale Sant'Anna Via Aldo Moro, 8 44124 Cona (FE) |
| **113** | **NAVA Stefano, Dr.** U.O. di Pneumologia e Terapia Intensiva Respiratoria Policlinico Sant'Orsola Malpighi Via Giuseppe Massarenti, 9 40138 Bologna | **Comitato Etico Area Vasta Emilia Centro** Policlinico Sant'Orsola Malpighi Via Albertoni, 15 40138 Bologna |
| **114** | **ROCCA Alberto, Dr.** U.O. di Pneumologia AUSL di Bologna - P.O. Bellaria "Carlo Pizzardi" Via Altura, 3 40139 Bologna | **Comitato Etico Area Vasta Emilia Centro** Segreteria Locale AUSL Bologna AUSL di Bologna Via Castiglione, 29 40100 Bologna |
| **117** | **~~MAZZA Francesco, Prof~~. DI PAOLO Alessandra, Dr.ssa** Dipartimento di Medicina Interna e Specialistica S.C. di Pneumologia Ospedale Santa Maria degli Angeli Via Montereale, 24 33170 Pordenone (PN) | **Comitato Etico Unico Regionale - CEUR** IRCCS Centro di Riferimento Oncologico - CRO Via Gallina, 2 33081 Aviano (PN( |
| **118** | **PETROIANNI Angelo, Prof.** U.O.C. Malattie Respiratorie A.O.U. Policlinico Umberto I Viale del Policlinico, 155 00161 Roma | **Comitato Etico dell'Università la Sapienza** A.O.U. Policlinico Umberto I Viale del Policlinico, 155 00161 Roma |
| **120** | **RICCI Alberto, Prof.** U.O.C. di Pneumologia A.O. Sant'Andrea Via di Grottarossa, 1035 00189 Roma | **Comitato Etico dell'Università la Sapienza** Segreteria Locale A.O. Sant'Andrea Ufficio Sperimentazioni Cliniche Via di Grottarossa, 1035ù 00189 Roma |
| **119** | **PAPALE Maria, Dr.ssa** Servizio di Fisiopatologia Respiratoria Istituto Nazionale Tumori "Regina Elena" IRCCS - IFO Viale Elio Chianesi, 53 00144 Roma | **Comitato Etico Centrale IRCCS - Sezione IFO - Fondazione Bietti** Istituti Fisioaterapici Ospitalieri - IFO Viale Elio Chianesi, 53 00144 Roma |
| **122** | **ROGLIANI Paola, Prof.ssa** U.O.C. Malattie dell'Apparato Respiratorio Fondazione Policlinico Tor Vergata Viale Oxford, 81 00133 Roma | **Comitato Etico Indipendente Fondazione PTV Policlinico Tor Vergata** Fondazione Policlinico Tor Vergata Viale Oxford, 81 00133 Roma |
| **124** | **PASSALACQUA Giovanni, Dr.** U.O. Malattie Respiratorie e Allergologia Ospedale Policlinico San Martino Largo Rosanna Benzi, 10 16132 Genova | **Comitato Etico Liguria Sezione 2** Ospedale Policlinico San Martino Largo Rosanna Benzi, 10 16132 Genova |
| **125** | **CENTANNI Stefano, Prof.** S.C. di Pneumologia ASST Santi Carlo e Paolo - P.O. San Carlo Via Pio II, 3 20153 Milano | **Comitato Etico Milano Area 1 - ASST Sacco Fatebenefratelli** Segreteria Locale ASST Santi Paolo e Carlo Via A. di Rudinì, 8 20124 Milano |
| **126** | **CORSICO Angelo, Dr.** Dipartimento toracovascolare - Pneumologia S.C. di Fisiopatologia Respiratoria Fondazione IRCCS Policlinico San Matteo Viale Camillo Golgi, 19 27100 Pavia | **Comitato Etico Pavia** Fondazione IRCCS Policlinico San Matteo Viale Camillo Golgi, 19 27100 Pavia |
| **127** | **DI MARCO Fabiano, Prof.** U.O.C. di Pneumologia ASST Papa Giovanni XXIII Piazza OMS, 1 24127 Bergamp | **Comitato Etico Provincia di Bergamo** ASST Papa Giovanni XXIII Piazza OMS, 1 24127 Bergamp |
| **129** | **RIARIO SFORZA Gian Galeazzo, Dr.** ASST Nord Milano - Ospedale della Città di Sesto S. Giovanni Viale Giacomo Matteotti, 83 20099 Sesto San Giovanni (MI) | **Comitato Etico Milano Area 3** Segreteria Comitato Etico ASST Grande Ospedale Metropolitano Nigiarda Piazza Ospedale Maggiore, 3 20162 Milano |
| **134** | **MARCHESANI Francesca, Dr.ssa** S.C. Pneumologia ASUR Marche - Ospedale Generale Provinciale Macertata Via Santa Lucia, 2 62100 Macerata | **Comitato Etico Regionale - CER della Marche** A.O.U. Ospedali Riuniti di Ancona Via Conca, 71 60126 Torrette di Ancona |
| **137** | **FOSCHINOMaria Pia, Prof.ssa** Dipartimento di Scienze Mediche e Chirurgiche AOU Ospedali Riuniti Foggia - Università degli Studi Foggia Viale Luigi Pinto, 1 71122 Foggia | **Comitato Etico Ospedali Riuniti di Foggia** AOU Ospedali Riuniti Foggia  Viale Luigi Pinto, 1 71122 Foggia |
| **140** | **PICCA Vito, Dr.** U.O.C. di Pneumologia - UTIR ASL Bari - Ospedale San Paolo Via Capposcardicchio - Quartiere San Paolo 70123 Bari | **Comitato Etico A.O.U. Consorziale Policlinico** Servizio Farmacia Piazza Giulio Cesare, 11 70124 Bari |
| **141** | **SCHINO Pietro, Dr.** U.O. di Fisiopatologia Respiratoria Ospedale Generale Regionale "F. Miulli" Strada Provinciale 127 Acquaviva - Santeramo - Km 4,100 70021 Acquaviva della Fonti (BA) | **Comitato Etico A.O.U. Consorziale Policlinico** Servizio Farmacia Piazza Giulio Cesare, 11 70124 Bari |
| **143** | **PIRINA, Pietro, Dr.** Struttura di Pneumologia A.O.U. Sassari - Cliniche San Pietro Viale S. Pietro,43 - Stecca Bianca  07100 Sassari | **Comitato Etico Indipendente dell'A.O.U. di Cagliari** Azienda Ospedaliero Universitaria Cagliari Via Ospedale, 54 09124 Cagliari |
| **145** | **CARAMORI Gaetano, Prof.** D.A.I. Medicine Specialistiche e Oncologia Medica U.O.C. Pneumologia A.O.U. Policlinico Universitario "G. Martino" Via Consolare Valeria, 1 98124 Messina | **Comitato Etico Interaziendale della Provincia di Messina** A.O- Policlinico Universitario “G. Martino” c/o Ufficio Protocollo Generale Via Consolare Valeria n. 1  98125 Gazzi- Messina |
| **146** | **CRIMI Nunzio, Prof.** Pneumologia Riabilitativa A.O.U. Policlinico "Vittorio Emanuele" - P.O. "Gaspare Rodolico" Via S. Sofia, 78 95125 Catania | **Comitato Etico Catania, 1** A.O.U. Policlinico "Vittorio Emanuele"  Via S. Sofia, 78 95125 Catania |
| **147** | **PENNISI Alfio, Dr.** Servizio di Fisiopatologia Respiratoria Casa di Cura Riabilitativa "Giosuè Calaciura" Strada Provonciale, 80 95033 Biancavilla (CT) | **Comitato Etico Catania 2** A.O.R.N. Garibaldi Piazza Santa Maria di Gesù, 5 95124 Catania |
| **148** | **VIVIANO Vittorio, Dr.** ASP di Palermo - Presidio Territoriale Di Assistenza PTA "Biondo" Via G. La Loggia, 5 90129 Palermo | **Comitato Etico Palermo 1** A.O.U. Paolo Giaccone Via del Vespro, 129 90127 Palermo |
| **149** | **BARGAGLI Elena, Dr.ssa** Dipartimento di Scienze Mediche, Chirurgiche e Neuroscienze Policlinico Santa Maria alle Scotte Viale Mario Bracci, 1 53100 Siena | **Comitato Etico Toscana Area Vasta Sud Est** A.O.U. Senese Farmacia Ospedaliera Viale Bracci 16 53100 Siena |
| **151** | **CAMICIOTTOLI Gianna, Dr.ssa** Pneumologia e Fisiopatologia Toraco-Polmonare A.O.U. Careggi Largo Brambilla, 3 50135 Firenze | **Comitato Etico Toscana Area Vasta Centro** Padiglione 9 Didattica - piano 3 - stanza 228 Nuovo Ingresso Careggi Largo Brambilla, 3 50134 Firenze |
| **162** | **VANNUCCI Franco, DR.** U.O. Pneumomolgia Aziendale USL Toscana Centro - Ospedale San Jacopo Via Ciliegiole, 98 51100 Pistoia | **Comitato Etico Toscana Area Vasta Centro** Padiglione 9 Didattica - piano 3 - stanza 228 Nuovo Ingresso Careggi Largo Brambilla, 3 50134 Firenze |
| **152** | **CARROZZI Laura, Prof.ssa** S.O.D. di Fisiopatologia Respiratoria e Riabilitazione Respiratoria A.O.U. Pisana - Stabilimento Cisanello Via Piero Trivella 56124 Pisa | **Comitato Etico toscana Area Vasta Nord-Ovest** A.O.U. Careggi Via Roma, 67 56126 Pisa |
| **155** | **MURGIA Nicola, Dr.** S.C. Medicina del Lavoro e Tossicologia Ospedale Santa Maria della Misericordia Piazzale Meneghini, 1 06129 Peurgia | **CEAS Umbria** Regione Umbria Palazzo Broletto - 3^ piano Via Mario Angeloni, 61 06124 Perugia |
| **157** | **RIVA Rodolfo, Dr.** S.S.D. Pneumologia e Riabilitazione Respiratoria AUSL Valle d'Aosta - Ospedale "Umberto Parini" Viale Ginevra, 3 11100 Aosta | **Comitato Etico dell'Azienda USL della Valle d'Aosta** Direzione Area Ospedaliera Ospedale "Umberto Parini" Viale Ginevra, 3 11100 Aosta |
| **158** | **MICHELETTO Claudio, DR.** UOC di Pneuologia Azienda Ospedaliera Universitaria Integrata  Piazzale Stefani 1  37122 Verona | **Comitato Etico per la Sperimentazione Clinica (CESC) delle Province di Verona e Rovigo** A.O.U.I. di Verona - Ospedale Borgo Trento c/o Farmacia Ospedaliera Piazzale Stefani, 1 37126 Verona |
| **160** | **ROMAGNOLI Micaela, Dr.ssa** U.O.C. Pneumologia Ospedale Cà Foncello Piazzale dell'Ospedale, 1 31100 Treviso TV | **Comitato Etico per la Sperimentazione delle Province di Treviso e Belluno (CESC)** U.O.C: Programmazione e Controllo Gestionale ULSS 2 Marca Trevigiana Via Sant'Ambrogio di Fiera, 37 31100 Treviso |
| **161** | **VIANELLO Andrea, Prof.** U.O. Fisiopatologia Respiratoria A.O. di Padova Via Nicolò Giustiniani, 2 35128 Padova | **Comitato Etico per la Sperimentazione Clinica della Provincia di Padova** A.O. di Padova Via Nicolò Giustiniani, 1 35128 Padova |
| **163** | **PAOLINI Valentina, Dr.ssa** Reparto di Pneumologia ASST di Monza - Ospedale San Gerardo Via G.B. Pergolesi, 33 20900 Monza | **Comitato Etico della Brianza** ASST di Monza  Via G.B. Pergolesi, 33 20900 Monza |
| **165** | **BANFI Paolo, Dr.** U.O. di Riabilitazione Intensiva IRCCS "S. Maria Nascente" - Fondazione Don Gnocchi Via Alfonso Capecelatro, 66 20148 Milano | **Comitato Etico IRCCS Fondazione Don Carlo Gnocchi** Fondazione Don Carlo Gnocchi Via Alfonso Capecelatro, 66 20148 Milano |
| **167** | **CREMONA George Ian, Dr.** Unità Funzionale di Pneumologia e Fisiopatologia Respiratoria Ospedale San Raffaele Via Olgettina, 60 20132 Milano | **Comitato Etico IRCCS Ospedale San Raffaele** Ospedale San Raffaele Via Olgettina, 60 20132 Milano |
| **168** | **SALIS Stefano, Dr.** U.O. di Pneumologia ATS Sardegna - ASSL Cagliari Ospedale Santissima Trinità  Via Is Mirrionis, 92  09121 Cagliari | **Comitato Etico ATS Sardegna** ATS Sardegna - Ospedale Civile Vecchio Via Enrico Costa, 57 07100 Sassari |
| **169** | **BOFFI Roberto, Dr.** S.S.D. di Pneumologia Fondazione IRCCS Istituto Nazionale dei Tumori Via Venezian, 1 20133 Milano | **Comitato Etico Fondazione IRCCS Istituto Nazionale dei Tumor**i Fondazione IRCCS Istituto Nazionale del Tumori Via Venezian, 1 20133 Milano |
| **170** | **MALERBA Mario, Prof.** S.C. Pneumologia ASL VC - P.O. Sant'Andrea Corso M. Abbiate, 21 13100 Vercelli | **ComitatoEtico Interaziendale A.O. SS Antonio e Biagio e Cesare Arrigo** A.O. SS Antonio e Biagio e Cesare Arrigo Via Venezian, 16 15121 Alessandria |

**Supplementary Table 2. 8-item questionnaire on satisfaction and usability**

| **Item** |  | **Fully disagree** |  |  |  |  | **Fully agree** |
| --- | --- | --- | --- | --- | --- | --- | --- |
| 1 | The preparation for the use of the device is easy | 0 | 1 | 2 | 3 | 4 | 5 |
| 2 | The device for the administration of the therapy is easy to be used | 0 | 1 | 2 | 3 | 4 | 5 |
| 3 | It has been easy to learn the use of the device | 0 | 1 | 2 | 3 | 4 | 5 |
| 4 | The device is manageable and comfortable | 0 | 1 | 2 | 3 | 4 | 5 |
| 5 | The perception of the intake of the drug is evident | 0 | 1 | 2 | 3 | 4 | 5 |
| 6 | I perceive to have used the device correctly | 0 | 1 | 2 | 3 | 4 | 5 |
| 7 | The current therapy administered with the device is easier than the previous therapy | 0 | 1 | 2 | 3 | 4 | 5 |
| 8 | I feel satisfied with the device | 0 | 1 | 2 | 3 | 4 | 5 |

**Supplementary Table 3. Concomitant diseases**

|  | **Patients (n=655), n (%)** |
| --- | --- |
| Patients with at least one concomitant disease | 506 (77.3%) |
| Vascular disorders  Hypertension | 279 (42.6%)  259 (39.5%) |
| Cardiac disorders  Atrial fibrillation  Myocardial ischemia | 166 (25.3%)  49 (7.5%)  44 (6.7%) |
| Metabolism and nutrition disorders  Diabetes  Dyslipidemia  Hypercholesterolemia | 149 (22.7%)  46 (7.0%)  33 (5.0%)  36 (5.5%) |
| Respiratory, thoracic and mediastinal disorders  Sleep apnea syndrome | 146 (22.3%)  31 (4.7%) |
| Gastrointestinal disorders  Gastroesophageal reflux disease | 77 (11.8%)   1. 42 (6.4%) |

**Supplementary Table 4. Previous therapies**

| **Previous therapies** | **Patients, n (%)**  **n= 655** |
| --- | --- |
| *Medication category*  Fixed combination ICS/LABA  LABA/LAMA  ICS/LABA/LAMA  Free combination ICS and LABA and LAMA  LABA and LAMA  ICS and LABA  Other | 168 (25.6%)  140 (21.4%)  62 (9.5%)  162 (24.7%)  47 (7.2%)  27 (4.1%)  49 (7.5%) |
| Reason for switching to BDP/FF/G  Symptoms persistence despite habitual therapy  Exacerbations persistence despite habitual therapy  pMDI preferred  Safety and characteristics of the drug  Other | 488 (74.5%)  364 (55.6%)  39 (6.0%)  32 (4.9%)  14 (2.1%) |

**Supplementary Table 5. Total CAT score and changes during the study, according to previous therapy**

|  | **Previous therapy** | | |
| --- | --- | --- | --- |
| **Bronchodilators** | **ICS + bronchodilator** | **Free triple therapy** |
| Baseline | 24.2 (8.92) | 21.7 (7.79) | 22.3 (6.75) |
| 6 months | 19.3 (7.90) | 17.1 (7.95) | 17.0 (7.95) |
| 12 months | 16.9 (7.65) | 15.1 (7.42) | 16.8 (8.13) |
| Mean change  6 months vs baseline  12 months vs baseline | -6.1 (5.13)*  -7.2 (7.15)* | -4.8 (5.54)*  -6.5 (7.06)* | -5.4 (6.93)*  -5.6 (8.57)* |

*Data expressed as mean (SD). *p<0.001*

**Supplementary Table 6. Percentage of patients reaching the maximum score on the 8-item satisfaction questionnaire according to previous therapies**

|  | **Bronchodilators (n=174)** | **ICS + bronchodilators (n=167)** | **Free-triple therapy (n=206)** | **All patients (n=594)** |
| --- | --- | --- | --- | --- |
| Baseline | 39.7% | 32.3% | 32.0% | 34.8% |
| 6 months* | 57.0% | 38.5% | 38.5% | 45.3% |
| 12 months* | 50.9% | 43.6% | 44.0% | 46.6% |

**p<0.001 for all the items vs baseline*

**Supplementary Table 7. Lung function outcomes.**

| **Timepoints** | **FEV1 (%)**  **n=512** | **FVC%**  **n=511** | **FEF25-75%**  **n=470** |
| --- | --- | --- | --- |
| Initiation | 50.2 (49.1–51.2) | 71.3 (70.0–72.6) | 24.3 (22.9-25.7) |
| Baseline | 53.9 (52.6–55.3) | 71.7 (70.1–73.4) | 29.6 (27.7 -31.5) |
| 6 months | 52.8 (51.5–54.2) | 71.8 (70.1–73.5) | 27.7 (25.7-29.7) |
| 12 months | 53.0 (51.8–54.2) | 72.0 (70.5–73.5) | 29.2 (27.51–30.9) |
| Mean change vs initiation  Baseline  6 months  12 months | 3.8 (2.0–5.5)*  2.7 (0.9–4.5)*  2.8 (1.2–4.5)* | 0.4 (-1.7–2.6)**  0.5 (-1.7–2.8)**  0.7 (-1.3–2.8)** | 5.2 (2.8–7.7)*  3.4 (0.8–5.9)*  4.8 (2.5–7.3)* |

*Data expressed as mean (95% CI). *p<0.0001 vs initiation; **p<0.0002 vs initiation.*

**Supplementary Table 8. Treatment-emergent adverse events**

|  | **Patients (n=655), n (%)** |
| --- | --- |
| Any TEAE  Any related TEAE  Any TEAE leading to study withdrawal | 236 (36%)  19 (2.9%)  34 (5.2%) |
| Any TESAE  Any related TESAE  Any TESAE leading to hospitalization  Any life-threatening TESAE  Any fatal TESAE | 76 (11.6%)  1 (0.2%)  58 (8.9%)  4 (0.6%)  19 (2.9%) |
| Serious TEAE  Cardiac Disorders  Infections And Infestations  COVID-19 Pneumonia  Pneumonia  Neoplasms benign, malignant and unspecified  Respiratory, thoracic and mediastinal disorders  Surgical and medical procedures | 15 (2.3%)  12 (1.8%)  4(0.6%)  3(0.5%)  8 (1.2%)  33 (5.0%)  7 (1.1%) |

**Supplementary Figure 1. Patients' disposition throughout the study.**


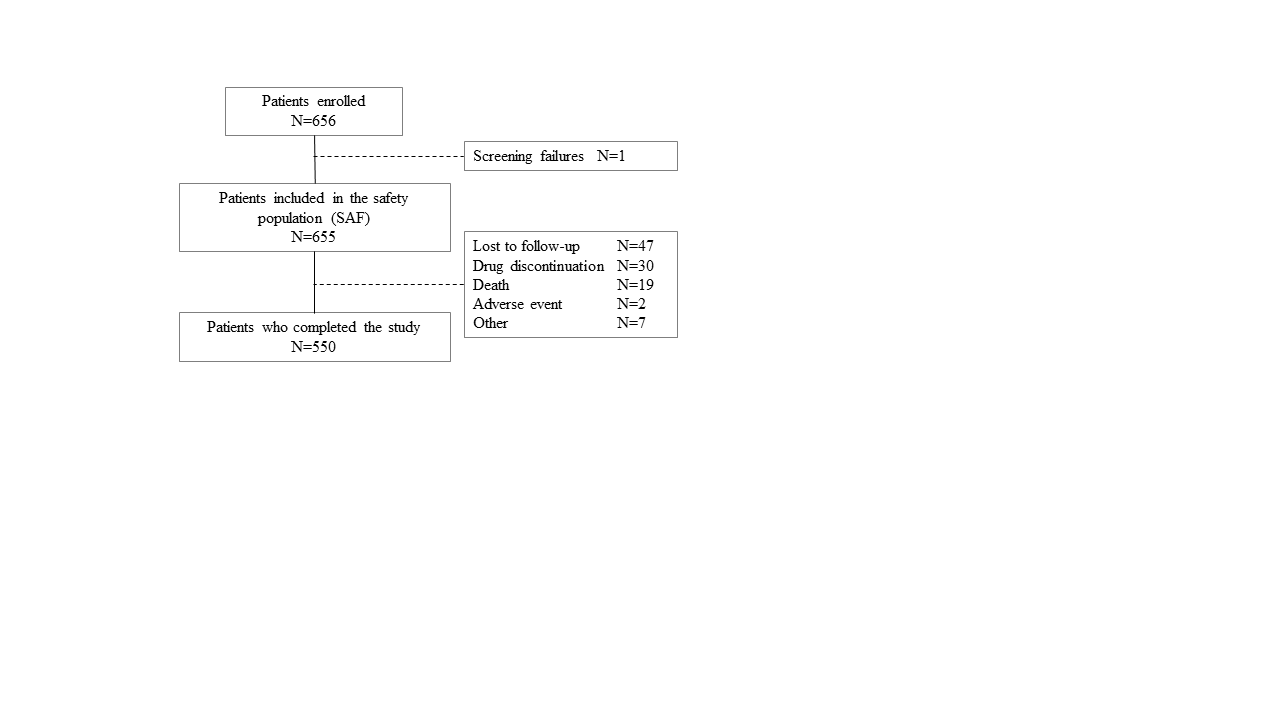

Supplement: Supplementary file 1 [file get_supplementary_file.php]
